# Supplementary material for: Association of miR-499 Polymorphism and Its Regulatory Networks with Hashimoto Thyroiditis Susceptibility: A Population-Based Case-Control Study
Source: MDPI journal article supplement (doi:10.3390/ijms221810094), 2021-09-18
Supplement: s1 [file s1]

**Supplementary Table S2.** Summary of functional enrichment in the network generated from initial PPIN selected genes (for complete details, see Supplementary File 4).

| Description                                                       | Observed | Background | Strength | FDR      |
|-------------------------------------------------------------------|----------|------------|----------|----------|
| <b>Biological process (GO)</b>                                    |          |            |          |          |
| Proteasome-mediated ubiquitin-dependent protein catabolic process | 10       | 323        | 1.29     | 3.02E-07 |
| Proteolysis                                                       | 15       | 1256       | 0.88     | 3.42E-07 |
| Macromolecule catabolic process                                   | 13       | 1058       | 0.89     | 5.19E-06 |
| Organonitrogen compound catabolic process                         | 13       | 1070       | 0.88     | 5.40E-06 |
| Regulation of canonical Wnt signaling pathway                     | 6        | 291        | 1.11     | 0.0016   |
| I- $\kappa$ B kinase/NF- $\kappa$ B signaling                     | 4        | 74         | 1.53     | 0.0017   |
| NIK/NF- $\kappa$ B signaling                                      | 4        | 81         | 1.49     | 0.0022   |
| Interleukin-1-mediated signaling pathway                          | 4        | 96         | 1.42     | 0.0034   |
| $\beta$ -catenin-TCF complex assembly                             | 3        | 29         | 1.81     | 0.0034   |
| Stress-activated MAPK cascade                                     | 4        | 107        | 1.37     | 0.0047   |
| <b>Molecular function (GO)</b>                                    |          |            |          |          |
| $\beta$ -catenin binding                                          | 6        | 86         | 1.64     | 3.18E-05 |
| Ubiquitin conjugating enzyme activity                             | 4        | 40         | 1.8      | 0.0017   |
| Transcription factor binding                                      | 8        | 672        | 0.88     | 0.0089   |
| Ubiquitin protein ligase binding                                  | 6        | 296        | 1.11     | 0.0089   |
| Enzyme binding                                                    | 13       | 2239       | 0.56     | 0.0122   |
| <b>Local network cluster (STRING)</b>                             |          |            |          |          |
| Canonical NF- $\kappa$ B pathway, and NF- $\kappa$ B/Dorsal       | 4        | 12         | 2.32     | 0.0449   |
| <b>KEGG pathway</b>                                               |          |            |          |          |
| Ubiquitin mediated proteolysis                                    | 8        | 135        | 1.57     | 2.05E-08 |
| Cell cycle                                                        | 7        | 120        | 1.57     | 2.13E-07 |
| Wnt signaling pathway                                             | 5        | 154        | 1.31     | 0.00027  |
| MAPK signaling pathway                                            | 5        | 288        | 1.04     | 0.0025   |
| Th1 and Th2 cell differentiation                                  | 3        | 87         | 1.34     | 0.0073   |
| IL-17 signaling pathway                                           | 3        | 92         | 1.31     | 0.0082   |
| NF- $\kappa$ B signaling pathway                                  | 3        | 101        | 1.27     | 0.0095   |
| Toll-like receptor signaling pathway                              | 3        | 101        | 1.27     | 0.0095   |
| Th17 cell differentiation                                         | 3        | 101        | 1.27     | 0.0095   |
| T cell receptor signaling pathway                                 | 3        | 101        | 1.27     | 0.0095   |
| <b>Reactome pathway</b>                                           |          |            |          |          |
| Adaptive Immune System                                            | 11       | 743        | 0.97     | 0.00012  |
| Signal Transduction                                               | 18       | 2741       | 0.62     | 0.00012  |
| Immune System                                                     | 16       | 1956       | 0.71     | 0.00012  |
| CLEC7A (Dectin-1) signaling                                       | 6        | 96         | 1.6      | 0.00012  |
| Antigen processing: Ubiquitination & Proteasome degradation       | 8        | 304        | 1.22     | 0.00012  |
| Inactivation of APC/C via direct inhibition of the APC/C complex  | 4        | 20         | 2.1      | 0.00015  |
| Fc $\epsilon$ RI signaling                                        | 5        | 129        | 1.39     | 0.0021   |
| Innate immune system                                              | 10       | 1025       | 0.79     | 0.0024   |

|                                                                                        |   |     |      |        |
|----------------------------------------------------------------------------------------|---|-----|------|--------|
| Interleukin-1 family signaling                                                         | 5 | 136 | 1.37 | 0.0024 |
| Activation of NF- $\kappa$ B in B cells                                                | 4 | 65  | 1.59 | 0.0034 |
| FCERI mediated NF- $\kappa$ B activation                                               | 4 | 80  | 1.5  | 0.0058 |
| Degradation of beta-catenin by the destruction complex                                 | 4 | 81  | 1.49 | 0.0059 |
| TRAF6 mediated induction of NF- $\kappa$ B and MAP kinases upon TLR7/8 or 9 activation | 4 | 89  | 1.45 | 0.0071 |
| Toll Like Receptor 3 (TLR3) Cascade                                                    | 4 | 92  | 1.44 | 0.0072 |
| Interleukin-1 signaling                                                                | 4 | 99  | 1.41 | 0.0073 |
| <b>Protein domains and features (InterPro)</b>                                         |   |     |      |        |
| NF- $\kappa$ B/Dorsal                                                                  | 3 | 5   | 2.58 | 0.0035 |
| Ubiquitin-conjugating enzyme E2                                                        | 4 | 38  | 1.82 | 0.0035 |
| Ubiquitin-conjugating enzyme, active site                                              | 4 | 25  | 2    | 0.0035 |
| Rel homology domain, conserved site                                                    | 3 | 5   | 2.58 | 0.0035 |
| NF- $\kappa$ B IPT domain                                                              | 3 | 5   | 2.58 | 0.0035 |
| Rel homology domain (RHD), DNA-binding domain                                          | 3 | 10  | 2.28 | 0.005  |
| Rel homology dimerisation domain                                                       | 3 | 10  | 2.28 | 0.005  |
| Rel homology domain (RHD), DNA-binding domain superfamily                              | 3 | 10  | 2.28 | 0.005  |
| Ubiquitin-conjugating enzyme/RWD-like                                                  | 4 | 53  | 1.68 | 0.0062 |
