# Supplementary material for: Association of miR-499 Polymorphism and Its Regulatory Networks with Hashimoto Thyroiditis Susceptibility: A Population-Based Case-Control Study
Source: MDPI journal article supplement (doi:10.3390/ijms221810094), 2021-09-18
Supplement: s1 [file s1]

**Supplementary Table S3.** Summary of functional enrichment in the network generated from initial co-expression network selected genes (for complete details, see Supplementary File 5).

| Description                                                                                                                                   | Observed | Background | Strength | FDR      |
|-----------------------------------------------------------------------------------------------------------------------------------------------|----------|------------|----------|----------|
| <b>Biological process (GO)</b>                                                                                                                |          |            |          |          |
| Immune system process                                                                                                                         | 14       | 2481       | 0.76     | 3.12E-05 |
| Immune response                                                                                                                               | 11       | 1588       | 0.85     | 0.00037  |
| Regulation of response to stimulus                                                                                                            | 15       | 4114       | 0.57     | 0.00067  |
| Immune response-activating cell surface receptor signaling pathway                                                                            | 5        | 311        | 1.22     | 0.0448   |
| Regulation of immune system process                                                                                                           | 8        | 1514       | 0.74     | 0.0448   |
| Positive regulation of immune system process                                                                                                  | 7        | 949        | 0.88     | 0.0448   |
| Signal transduction                                                                                                                           | 14       | 4876       | 0.47     | 0.0448   |
| Positive regulation of catalytic activity                                                                                                     | 8        | 1489       | 0.74     | 0.0448   |
| Positive regulation of GTPase activity                                                                                                        | 5        | 407        | 1.1      | 0.0448   |
| Leukocyte activation                                                                                                                          | 7        | 929        | 0.89     | 0.0448   |
| Regulation of immune response                                                                                                                 | 7        | 896        | 0.91     | 0.0448   |
| Antigen receptor-mediated signaling pathway                                                                                                   | 4        | 199        | 1.32     | 0.0448   |
| Positive regulation of T cell activation                                                                                                      | 4        | 209        | 1.29     | 0.0448   |
| Leukocyte migration                                                                                                                           | 5        | 316        | 1.21     | 0.0448   |
| <b>Local network cluster (STRING)</b>                                                                                                         |          |            |          |          |
| Mixed, incl. Generation of second messenger molecules, and Antigen activates B Cell Receptor (BCR) leading to generation of second messengers | 6        | 38         | 2.21     | 1.17E-05 |
| Mixed, incl. T cell receptor complex, and CD28 dependent Vav1 pathway                                                                         | 4        | 22         | 2.27     | 0.0091   |
| <b>KEGG pathway</b>                                                                                                                           |          |            |          |          |
| Natural killer cell mediated cytotoxicity                                                                                                     | 4        | 121        | 1.53     | 0.0026   |
| Yersinia infection                                                                                                                            | 4        | 125        | 1.52     | 0.0026   |
| T cell receptor signaling pathway                                                                                                             | 3        | 101        | 1.49     | 0.0201   |
| <b>Reactome pathway</b>                                                                                                                       |          |            |          |          |
| Immune system                                                                                                                                 | 11       | 1956       | 0.76     | 0.0062   |
| Generation of second messenger molecules                                                                                                      | 3        | 29         | 2.03     | 0.0328   |
| <b>Protein domains and features (InterPro)</b>                                                                                                |          |            |          |          |
| SH2 domain                                                                                                                                    | 4        | 112        | 1.57     | 0.0468   |
| SH3 domain                                                                                                                                    | 5        | 221        | 1.37     | 0.0468   |
| SH3-like domain superfamily                                                                                                                   | 5        | 211        | 1.39     | 0.0468   |
| SH2 domain superfamily                                                                                                                        | 4        | 113        | 1.56     | 0.0468   |
