# Supplementary material for: Association of miR-499 Polymorphism and Its Regulatory Networks with Hashimoto Thyroiditis Susceptibility: A Population-Based Case-Control Study
Source: MDPI journal article supplement (doi:10.3390/ijms221810094), 2021-09-18
Supplement: s1 [file s1]

**Supplementary Table S4.** Summary of functional enrichment in the network generated from initial miR-TF selected genes (for complete details, see Supplementary File 6).

| Description                                                                     | Observed | Background | Strength | FDR      |
|---------------------------------------------------------------------------------|----------|------------|----------|----------|
| <b>Biological process (GO)</b>                                                  |          |            |          |          |
| Positive regulation of cellular biosynthetic process                            | 16       | 2005       | 0.89     | 4.04E-09 |
| Positive regulation of transcription, DNA-templated                             | 14       | 1587       | 0.94     | 2.39E-08 |
| Interleukin-1-mediated signaling pathway                                        | 6        | 96         | 1.79     | 4.58E-07 |
| I- $\kappa$ B kinase/NF- $\kappa$ B signaling                                   | 5        | 74         | 1.82     | 8.10E-06 |
| Negative regulation of cell death                                               | 10       | 999        | 0.99     | 8.19E-06 |
| NIK/NF- $\kappa$ B signaling                                                    | 5        | 81         | 1.78     | 1.13E-05 |
| Negative regulation of apoptotic signaling pathway                              | 6        | 232        | 1.4      | 4.45E-05 |
| Regulation of type I interferon production                                      | 5        | 130        | 1.58     | 7.45E-05 |
| Fc-epsilon receptor signaling pathway                                           | 4        | 115        | 1.53     | 0.0011   |
| Regulation of canonical Wnt signaling pathway                                   | 5        | 291        | 1.23     | 0.0015   |
| Response to cytokine                                                            | 8        | 1101       | 0.85     | 0.0012   |
| Pattern recognition receptor signaling pathway                                  | 4        | 125        | 1.5      | 0.0013   |
| Positive regulation of protein ubiquitination                                   | 4        | 126        | 1.49     | 0.0014   |
| Regulation of innate immune response                                            | 5        | 301        | 1.21     | 0.0017   |
| Negative regulation of NF- $\kappa$ B transcription factor activity             | 3        | 85         | 1.54     | 0.0077   |
| Toll-like receptor signaling pathway                                            | 3        | 100        | 1.47     | 0.0109   |
| <b>Molecular function (GO)</b>                                                  |          |            |          |          |
| Transcription regulatory region sequence-specific DNA binding                   | 9        | 1028       | 0.93     | 0.0007   |
| RNA polymerase II transcription regulatory region sequence-specific DNA binding | 8        | 878        | 0.95     | 0.0007   |
| DNA-binding transcription activator activity, RNA polymerase II-specific        | 7        | 449        | 1.18     | 0.0007   |
| Chromatin binding                                                               | 7        | 570        | 1.08     | 0.0007   |
| DNA-binding transcription factor activity                                       | 9        | 1238       | 0.85     | 0.0007   |
| Transcription factor binding                                                    | 8        | 672        | 1.07     | 0.0007   |
| Ubiquitin protein ligase binding                                                | 6        | 296        | 1.3      | 0.0007   |
| Transcription regulator activity                                                | 11       | 1657       | 0.81     | 0.0007   |
| $\beta$ -catenin binding                                                        | 3        | 86         | 1.53     | 0.0189   |
| <b>Local network cluster (STRING)</b>                                           |          |            |          |          |
| Canonical NF- $\kappa$ B pathway, and NF- $\kappa$ B/Dorsal                     | 6        | 12         | 2.69     | 4.45E-08 |
| <b>KEGG pathway</b>                                                             |          |            |          |          |
| Chemokine signaling pathway                                                     | 5        | 186        | 1.42     | 5.62E-05 |
| RIG-I-like receptor signaling pathway                                           | 4        | 70         | 1.75     | 5.62E-05 |
| B cell receptor signaling pathway                                               | 4        | 78         | 1.7      | 5.62E-05 |
| Th1 and Th2 cell differentiation                                                | 4        | 87         | 1.65     | 6.47E-05 |
| IL-17 signaling pathway                                                         | 4        | 92         | 1.63     | 6.59E-05 |
| NF- $\kappa$ B signaling pathway                                                | 4        | 101        | 1.59     | 7.65E-05 |
| Toll-like receptor signaling pathway                                            | 4        | 101        | 1.59     | 7.65E-05 |
| T cell receptor signaling pathway                                               | 4        | 101        | 1.59     | 7.65E-05 |
| TNF signaling pathway                                                           | 4        | 112        | 1.54     | 8.84E-05 |

| Reactome pathway                                                                       |   |      |      |          |
|----------------------------------------------------------------------------------------|---|------|------|----------|
| Activation of NF- $\kappa$ B in B cells                                                | 6 | 65   | 1.96 | 1.18E-06 |
| I $\kappa$ BA variant leads to EDA-ID                                                  | 4 | 7    | 2.75 | 1.79E-06 |
| Interleukin-1 signaling                                                                | 6 | 99   | 1.77 | 3.25E-06 |
| Fc $\epsilon$ RI mediated NF- $\kappa$ B activation                                    | 5 | 80   | 1.79 | 2.77E-05 |
| TRAF6 mediated NF- $\kappa$ B activation                                               | 4 | 24   | 2.21 | 2.77E-05 |
| Toll Like Receptor 3 (TLR3) Cascade                                                    | 5 | 92   | 1.73 | 3.42E-05 |
| Downstream TCR signaling                                                               | 5 | 91   | 1.73 | 3.42E-05 |
| TRAF6 mediated induction of NF- $\kappa$ B and MAP kinases upon TLR7/8 or 9 activation | 5 | 89   | 1.74 | 3.42E-05 |
| TAK1 activates NF- $\kappa$ B by phosphorylation and activation of IKKs complex        | 4 | 32   | 2.09 | 3.44E-05 |
| CLEC7A (Dectin-1) signaling                                                            | 5 | 96   | 1.71 | 3.44E-05 |
| TRIF(TICAM1)-mediated TLR4 signaling                                                   | 5 | 96   | 1.71 | 3.44E-05 |
| NF- $\kappa$ B is activated and signals survival                                       | 3 | 13   | 2.35 | 0.00024  |
| Adaptive Immune System                                                                 | 7 | 743  | 0.96 | 0.0023   |
| Signaling by WNT                                                                       | 5 | 296  | 1.22 | 0.0041   |
| Immune System                                                                          | 9 | 1956 | 0.65 | 0.0173   |
| Protein domains and features (InterPro)                                                |   |      |      |          |
| NF- $\kappa$ B/Dorsal                                                                  | 3 | 5    | 2.77 | 0.0015   |
| NF- $\kappa$ B IPT domain                                                              | 3 | 5    | 2.77 | 0.0015   |
| Rel homology domain (RHD), DNA-binding domain                                          | 3 | 10   | 2.47 | 0.0019   |
| Rel homology dimerization domain                                                       | 3 | 10   | 2.47 | 0.0019   |
| Rel homology domain (RHD), DNA-binding domain superfamily                              | 3 | 10   | 2.47 | 0.0019   |
| p53-like transcription factor, DNA-binding                                             | 3 | 44   | 1.82 | 0.0467   |
