# Supplementary material for: Association of miR-499 Polymorphism and Its Regulatory Networks with Hashimoto Thyroiditis Susceptibility: A Population-Based Case-Control Study
Source: MDPI journal article supplement (doi:10.3390/ijms221810094), 2021-09-18
Supplement: s1 [file s1]

**Supplementary Table S1.** Selected nodes based on initial analyses for PPIN, miR-TF and co-expression regulatory networks. Nodes with the highest degree were used for new networks reconstruction using the STRING (v11.5) database.

| Label                              | Degree | Betweenness |
|------------------------------------|--------|-------------|
| <b>From initial PPIN</b>           |        |             |
| MEOX2                              | 174    | 105725.3    |
| SDCBP                              | 83     | 62693.4     |
| UBE2D3                             | 71     | 58615.64    |
| MAPK8                              | 71     | 52068.96    |
| NFKBIA                             | 47     | 29486.37    |
| HSPA1L                             | 45     | 33307.74    |
| IVNS1ABP                           | 41     | 31631.25    |
| MAD2L1                             | 40     | 43529.36    |
| UBE2E3                             | 34     | 15498.3     |
| TCF7L2                             | 20     | 13988.14    |
| PLS3                               | 19     | 16845.91    |
| <b>From initial co-expression</b>  |        |             |
| GPR65                              | 37     | 666         |
| TAGAP                              | 1      | 0           |
| MYO1F                              | 1      | 0           |
| MAP4K1                             | 1      | 0           |
| CD5                                | 1      | 0           |
| ARHGAP9                            | 1      | 0           |
| CD48                               | 1      | 0           |
| VAV1                               | 1      | 0           |
| IL10RA                             | 1      | 0           |
| FYB                                | 1      | 0           |
| PSTPIP1                            | 1      | 0           |
| IKZF1                              | 1      | 0           |
| CD84                               | 1      | 0           |
| NCKAP1L                            | 1      | 0           |
| <b>From initial miR-TF network</b> |        |             |
| ZIC2                               | 292    | 220452.09   |
| NFKBIA                             | 102    | 71452.21    |
| RAP2C                              | 76     | 29506.18    |
| HOXA5                              | 72     | 33168.41    |
| TCF7L2                             | 58     | 33137.3     |
| EYA1                               | 57     | 19536.4     |
| UBE2D3                             | 50     | 28115.07    |
| STIM2                              | 50     | 19542.13    |
| ZFAND5                             | 48     | 16422.28    |
| MEOX2                              | 47     | 20024.36    |
